# Supplementary material for: Behavioral interventions to improve population health outreach for hepatitis C screening: randomized clinical trial
Source: PubMed Central journal article supplement — BMJ. 2021 May 18;373:n1022. doi: 10.1136/bmj.n1022 (PMC8129827; doi:10.1136/bmj.n1022), 2021-05-18
Supplement: mehs063397.ww2.pdf [file mehs063397.ww2.pdf]

## Supplementary Tables

Supplementary Table 1. Average number of office visits by subgroup (4 months)

|                                           | Average number office visits, mean (SD) |
|-------------------------------------------|-----------------------------------------|
| <b>Substudy A – Opt-in / Opt-out</b>      |                                         |
| Letter Only (A1) (n=813)                  | .77 (1.01)                              |
| Letter + Lab Order (A2) (n=829)           | .74 (.91)                               |
| <b>Substudy B – Content</b>               |                                         |
| Usual Care Messaging (B1+B3+B5) (n=9,828) | .69 (.91)                               |
| Behavioral Messaging (B2+B4+B6) (n=9,833) | .66 (.86)                               |
| <b>Substudy B – Communication Mode</b>    |                                         |
| Mailed Letters ((B1+B2) (n=1,897)         | .66 (.86)                               |
| Patient Portal Messages (B3+B4) (n=9,498) | .70 (.89)                               |

Supplementary Table 2. Substudy A - Screening participation by subgroup

|                              | Letter Only<br>N (%) | Letter + Lab Order<br>N (%) | p-value |
|------------------------------|----------------------|-----------------------------|---------|
| <b>Patient Portal Status</b> |                      |                             |         |
| Active                       | 120/552 (21.7)       | 252/547 (46.1)              | <.001*  |
| Inactive                     | 36/261 (13.8)        | 105/282 (37.2)              | <.001*  |
| <b>Sex</b>                   |                      |                             |         |
| Male                         | 66/348 (19.0)        | 150/341 (44.0)              | <.001*  |
| Female                       | 90/465 (19.4)        | 207/488 (42.4)              | <.001*  |
| <b>Race</b>                  |                      |                             |         |
| White                        | 120/638 (18.1)       | 284/657 (43.2)              | <.001*  |
| Black                        | 21/106 (19.8)        | 40/103 (38.8)               | .002*   |
| Asian                        | 4/21 (19.1)          | 7/12 (58.3)                 | .02     |
| Other                        | 4/20 (20.0)          | 11/29 (37.9)                | .18     |
| Unknown                      | 7/28 (25.0)          | 15/28 (53.6)                | .03     |
| <b>Ethnicity</b>             |                      |                             |         |
| Hispanic                     | 1/12 (8.3)           | 3/7 (42.9)                  | .08     |
| Not-Hispanic                 | 154/787 (19.6)       | 345/807 (42.8)              | <.001*  |
| Unknown                      | 1/14 (7.1)           | 9/15 (60.0)                 | .03     |
| <b>Age</b>                   |                      |                             |         |
| < 58                         | 21/190 (11.1)        | 65/207 (31.4)               | <.001*  |
| 58-62                        | 34/188 (18.1)        | 87/198 (43.9)               | <.001*  |
| 63-67                        | 52/201 (25.9)        | 68/165 (41.2)               | .002*   |
| ≥ 68                         | 49/234 (20.9)        | 137/259 (52.9)              | <.001*  |
| <b>Income<sup>2</sup></b>    |                      |                             |         |
| < \$50,000                   | 19/102 (18.6)        | 45/108 (41.7)               | <.001*  |
| \$50,000 – 99,999            | 86/461 (18.7)        | 191/442 (43.2)              | <.001*  |
| \$100,000 – 149,999          | 47/232 (20.3)        | 111/263 (42.2)              | <.001*  |
| ≥ \$150,000                  | 2/11 (18.2)          | 6/8 (75.0)                  | .01     |

\* P-value of less than .05/6 = .008 considered statistically significant using Bonferroni correction to account for multiples comparisons

<sup>1</sup> Missing data for 15 participants

Supplementary Table 3. Substudy B (Content type)- Screening participation by subgroup

|                              | Usual Care<br>Messaging<br>N (%) | Behavioral Content<br>Messaging<br>N (%) | p-value |
|------------------------------|----------------------------------|------------------------------------------|---------|
| <b>Patient Portal Status</b> |                                  |                                          |         |
| Active                       | 866/5,697 (15.2)                 | 784/5,698 (13.8)                         | .03     |
| Inactive                     | 565/4,131 (13.7)                 | 557/4,135 (13.5)                         | .78     |
| <b>Sex</b>                   |                                  |                                          |         |
| Male                         | 651/4,461 (14.6)                 | 626/4,476 (14.0)                         | .41     |
| Female                       | 780/5,367 (14.5)                 | 715/5,357 (13.4)                         | .08     |
| <b>Race</b>                  |                                  |                                          |         |
| White                        | 1,140/7,822 (14.6)               | 1,051/7,869 (13.4)                       | .03     |
| Black                        | 192/1,167 (16.5)                 | 173/1,152 (15.0)                         | .34     |
| Asian                        | 29/193 (15.0)                    | 27/196 (13.8)                            | .73     |
| Other                        | 29/249 (11.7)                    | 33/254 (13.0)                            | .65     |
| Unknown                      | 41/397 (10.3)                    | 57/362 (15.8)                            | .03     |
| <b>Ethnicity</b>             |                                  |                                          |         |
| Hispanic                     | 77/398 (19.4)                    | 76/406 (18.7)                            | .82     |
| Not-Hispanic                 | 1,343/9,351 (14.4)               | 1,241/9,357 (13.4)                       | .05     |
| Unknown                      | 11/79 (13.9)                     | 14/70 (20.0)                             | .32     |
| <b>Age</b>                   |                                  |                                          |         |
| < 58                         | 271/2,464 (11.0)                 | 238/2,450 (9.7)                          | .14     |
| 58-62                        | 308/2,415 (12.8)                 | 297/2,503 (11.9)                         | .34     |
| 63-67                        | 371/2,274 (16.3)                 | 359/2,300 (15.6)                         | .51     |
| ≥ 68                         | 481/2,675 (18.0)                 | 447/2,580 (17.3)                         | .53     |
| <b>Income<sup>2</sup></b>    |                                  |                                          |         |
| < \$50,000                   | 179/1,084 (16.5)                 | 157/1,041 (15.1)                         | .37     |
| \$50,000 – 99,999            | 891/6,413 (13.9)                 | 841/6,320 (13.3)                         | .35     |
| \$100,000 – 149,999          | 339/2,190 (15.5)                 | 317/2,301 (13.8)                         | .11     |
| ≥ \$150,000                  | 6/52 (11.5)                      | 11/76 (14.5)                             | .63     |

\* P-value of less than .05/6 = .008 considered statistically significant using Bonferroni correction to account for multiples comparisons

<sup>1</sup> Missing data for 184 participants

Supplementary Table 4. Substudy B (Communication modality)- Screening participation by subgroup

|                           | Mailed Letter<br>N (%) | Patient Portal<br>Message<br>N (%) | p-value |
|---------------------------|------------------------|------------------------------------|---------|
| <b>Sex</b>                |                        |                                    |         |
| Male                      | 157/843 (36.3)         | 608/4,159 (30.9)                   | .003*   |
| Female                    | 180/1,054 (17.1)       | 705/5,339 (13.2)                   | .001*   |
| <b>Race</b>               |                        |                                    |         |
| White                     | 275/1,581 (17.4)       | 1,107/8,002 (13.3)                 | <.001*  |
| Black                     | 40/164 (24.4)          | 97/734 (13.2)                      | <.001*  |
| Asian                     | 2/46 (4.4)             | 35/182 (19.2)                      | .01     |
| Other                     | 8/42 (19.1)            | 30/222 (13.5)                      | .35     |
| Unknown                   | 12/64 (18.8)           | 44/358 (12.3)                      | .16     |
| <b>Ethnicity</b>          |                        |                                    |         |
| Hispanic                  | 6/27 (22.2)            | 21/121 (17.4)                      | .55     |
| Not-Hispanic              | 329/1,848 (17.8)       | 1,278/9,304 (13.7)                 | <.001*  |
| Unknown                   | 2/22 (9.1)             | 14/73 (19.2)                       | .27     |
| <b>Age</b>                |                        |                                    |         |
| < 58                      | 58/443 (13.1)          | 233/2,312 (10.1)                   | .06     |
| 58-62                     | 70/467 (15.0)          | 291/2,316 (12.6)                   | .16     |
| 63-67                     | 85/460 (18.5)          | 355/2,282 (15.6)                   | .12     |
| ≥ 68                      | 124/527 (23.5)         | 434/2,588 (16.8)                   | <.001*  |
| <b>Income<sup>1</sup></b> |                        |                                    |         |
| < \$50,000                | 29/143 (20.3)          | 96/733 (13.1)                      | .03     |
| \$50,000 – 99,999         | 209/1,224 (17.1)       | 820/6,153 (13.3)                   | .001*   |
| \$100,000 – 149,999       | 93/487 (19.1)          | 466/2,480 (15.7)                   | .03     |
| ≥ \$150,000               | 4/21 (19.1)            | 10/74 (13.5)                       | .53     |

\* P-value of less than  $.05/6 = .008$  considered statistically significant using Bonferroni correction to account for multiples comparisons

<sup>1</sup> Missing data for 80 participants
